# Supplementary material for: An age‐dependent mathematical model of neurofilament trafficking in healthy conditions
Source: PubMed Central journal article supplement — CPT Pharmacometrics Syst Pharmacol. 2022 Mar 2;11(4):447–57. doi: 10.1002/psp4.12770 (PMC9007607; doi:10.1002/psp4.12770), 2022-03-02
Supplement: PSP4-11-447-s002.pdf [file PSP4-11-447-s002.pdf]

# An age dependent Mathematical Model of Neurofilament Trafficking in Healthy Conditions

Alessio Paris, Pranami Bora, Silvia Parolo, Michael Monine, Xiao Tong, Satish Eraly, Eric Masson, Toby Ferguson, Alexander McCampbell, Danielle Graham, Enrico Domenici, Ivan Nestorov, Luca Marchetti

## Supplementary Material

$$\begin{aligned}
 \text{CNS} & \begin{cases} \frac{d[\text{NfL}]_{\text{CNS}}}{dt} = r_1^L - r_2 [\text{NfL}]_{\text{CNS}} - r_5^L f(\text{age}) [\text{NfL}]_{\text{CNS}} \\ \frac{d[\text{NfM}]_{\text{CNS}}}{dt} = r_1^M - r_2 [\text{NfM}]_{\text{CNS}} - r_5^M f(\text{age}) [\text{NfM}]_{\text{CNS}} \\ \frac{d[\text{pNfH}]_{\text{CNS}}}{dt} = r_1^H - r_2 [\text{pNfH}]_{\text{CNS}} - r_5^H f(\text{age}) [\text{pNfH}]_{\text{CNS}} \end{cases} \\
 \text{PNS} & \begin{cases} \frac{d[\text{NfL}]_{\text{PNS}}}{dt} = r_3^L - r_4 [\text{NfL}]_{\text{PNS}} - r_6^L f(\text{age}) [\text{NfL}]_{\text{PNS}} \\ \frac{d[\text{NfM}]_{\text{PNS}}}{dt} = r_3^M - r_4 [\text{NfM}]_{\text{PNS}} - r_6^M f(\text{age}) [\text{NfM}]_{\text{PNS}} \\ \frac{d[\text{pNfH}]_{\text{PNS}}}{dt} = r_3^H - r_4 [\text{pNfH}]_{\text{PNS}} - r_6^H f(\text{age}) [\text{pNfH}]_{\text{PNS}} \end{cases} \\
 \text{ISF} & \begin{cases} \frac{d[\text{NfL}]_{\text{ISF}}}{dt} = r_5^L f(\text{age}) \frac{V_{\text{CNS}}}{V_{\text{ISF}}} [\text{NfL}]_{\text{CNS}} - \frac{r_7}{V_{\text{ISF}}} [\text{NfL}]_{\text{ISF}} \\ \frac{d[\text{NfM}]_{\text{ISF}}}{dt} = r_5^M f(\text{age}) \frac{V_{\text{CNS}}}{V_{\text{ISF}}} [\text{NfM}]_{\text{CNS}} - \frac{r_7}{V_{\text{ISF}}} [\text{NfM}]_{\text{ISF}} \\ \frac{d[\text{pNfH}]_{\text{ISF}}}{dt} = r_5^H f(\text{age}) \frac{V_{\text{CNS}}}{V_{\text{ISF}}} [\text{pNfH}]_{\text{CNS}} - \frac{r_7}{V_{\text{ISF}}} [\text{pNfH}]_{\text{ISF}} \end{cases} \\
 \text{Endoneurial fluid} & \begin{cases} \frac{d[\text{NfL}]_{\text{endo}}}{dt} = r_6^L f(\text{age}) \frac{V_{\text{PNS}}}{V_{\text{endo}}} [\text{NfL}]_{\text{PNS}} - \frac{r_8}{V_{\text{endo}}} [\text{NfL}]_{\text{endo}} \\ \frac{d[\text{NfM}]_{\text{endo}}}{dt} = r_6^M f(\text{age}) \frac{V_{\text{PNS}}}{V_{\text{endo}}} [\text{NfM}]_{\text{PNS}} - \frac{r_8}{V_{\text{endo}}} [\text{NfM}]_{\text{endo}} \\ \frac{d[\text{pNfH}]_{\text{endo}}}{dt} = r_6^H f(\text{age}) \frac{V_{\text{PNS}}}{V_{\text{endo}}} [\text{pNfH}]_{\text{PNS}} - \frac{r_8}{V_{\text{endo}}} [\text{pNfH}]_{\text{endo}} \end{cases} \\
 \text{CSF cranial} & \begin{cases} \frac{d[\text{NfL}]_{\text{cranial}}}{dt} = \frac{r_7}{V_{\text{cranial}}} [\text{NfL}]_{\text{ISF}} - \frac{r_9}{V_{\text{cranial}}} [\text{NfL}]_{\text{cranial}} + \frac{r_{10}}{V_{\text{cranial}}} [\text{NfL}]_{\text{spinal}} - \frac{r_{11}}{V_{\text{cranial}}} [\text{NfL}]_{\text{cranial}} \\ \frac{d[\text{NfM}]_{\text{cranial}}}{dt} = \frac{r_7}{V_{\text{cranial}}} [\text{NfM}]_{\text{ISF}} - \frac{r_9}{V_{\text{cranial}}} [\text{NfM}]_{\text{cranial}} + \frac{r_{10}}{V_{\text{cranial}}} [\text{NfM}]_{\text{spinal}} - \frac{r_{11}}{V_{\text{cranial}}} [\text{NfM}]_{\text{cranial}} \\ \frac{d[\text{pNfH}]_{\text{cranial}}}{dt} = \frac{r_7}{V_{\text{cranial}}} [\text{pNfH}]_{\text{ISF}} - \frac{r_9}{V_{\text{cranial}}} [\text{pNfH}]_{\text{cranial}} + \frac{r_{10}}{V_{\text{cranial}}} [\text{pNfH}]_{\text{spinal}} - \frac{r_{11}}{V_{\text{cranial}}} [\text{pNfH}]_{\text{cranial}} \end{cases} \\
 \text{CSF spinal} & \begin{cases} \frac{d[\text{NfL}]_{\text{spinal}}}{dt} = \frac{r_9}{V_{\text{spinal}}} [\text{NfL}]_{\text{cranial}} - \frac{r_{10}}{V_{\text{spinal}}} [\text{NfL}]_{\text{spinal}} - \frac{r_{12}}{V_{\text{spinal}}} [\text{NfL}]_{\text{spinal}} + \frac{r_8}{V_{\text{spinal}}} [\text{NfL}]_{\text{endo}} \\ \frac{d[\text{NfM}]_{\text{spinal}}}{dt} = \frac{r_9}{V_{\text{spinal}}} [\text{NfM}]_{\text{cranial}} - \frac{r_{10}}{V_{\text{spinal}}} [\text{NfM}]_{\text{spinal}} - \frac{r_{12}}{V_{\text{spinal}}} [\text{NfM}]_{\text{spinal}} + \frac{r_8}{V_{\text{spinal}}} [\text{NfM}]_{\text{endo}} \\ \frac{d[\text{pNfH}]_{\text{spinal}}}{dt} = \frac{r_9}{V_{\text{spinal}}} [\text{pNfH}]_{\text{cranial}} - \frac{r_{10}}{V_{\text{spinal}}} [\text{pNfH}]_{\text{spinal}} - \frac{r_{12}}{V_{\text{spinal}}} [\text{pNfH}]_{\text{spinal}} + \frac{r_8}{V_{\text{spinal}}} [\text{pNfH}]_{\text{endo}} \end{cases} \\
 \text{Blood} & \begin{cases} \frac{d[\text{NfL}]_{\text{blood}}}{dt} = \frac{r_{11}}{V_{\text{blood}}} [\text{NfL}]_{\text{cranial}} + \frac{r_{12}}{V_{\text{blood}}} [\text{NfL}]_{\text{spinal}} - r_{13}^L [\text{NfL}]_{\text{blood}} \\ \frac{d[\text{NfM}]_{\text{blood}}}{dt} = \frac{r_{11}}{V_{\text{blood}}} [\text{NfM}]_{\text{cranial}} + \frac{r_{12}}{V_{\text{blood}}} [\text{NfM}]_{\text{spinal}} - r_{13}^M [\text{NfM}]_{\text{blood}} \\ \frac{d[\text{pNfH}]_{\text{blood}}}{dt} = \frac{r_{11}}{V_{\text{blood}}} [\text{pNfH}]_{\text{cranial}} + \frac{r_{12}}{V_{\text{blood}}} [\text{pNfH}]_{\text{spinal}} - r_{13}^H [\text{pNfH}]_{\text{blood}} \end{cases}
 \end{aligned}$$

Figure S1. Ordinary Differential Equation system representing the implementation of the Nf trafficking model. The system describes the concentration levels in the seven compartments of the model for NfL, NfM, and pNfH separately. Reaction rates that have different values for the three subunits have the label “L”, “M”, or “H”. Parameter estimates and the definition of the  $f(\text{age})$  function are provided in Supplementary Table S1.

| Parameter | Nf Subunit | Estimate                           | Reference                                                                                   |
|-----------|------------|------------------------------------|---------------------------------------------------------------------------------------------|
| r1        | NfL        | 1310.678 ng/(ml*day)               | Assumed to be at equilibrium with degradation reaction r2 for initial concentration in CNS  |
|           | NfM        | 11755.78 ng/(ml*day)               | Assumed to be at equilibrium with degradation reaction r2 for initial concentration in CNS  |
|           | pNfH       | 12300.21 ng/(ml*day)               | Assumed to be at equilibrium with degradation reaction r2 for initial concentration in CNS  |
| r2        | All        | 0.01 1/day                         | [1] [2]                                                                                     |
| r3        | NfL        | 1310.678 ng/(ml*day)               | Assumed to be at equilibrium with degradation reaction r4 for initial concentration in PNS  |
|           | NfM        | 11755.78 ng/(ml*day)               | Assumed to be at equilibrium with degradation reaction r4 for initial concentration in PNS  |
|           | pNfH       | 12300.21 ng/(ml*day)               | Assumed to be at equilibrium with degradation reaction r4 for initial concentrations in PNS |
| r4        | All        | 0.01 1/day                         | [1] [2]                                                                                     |
| r5        | NfL        | $7.3 \times 10^{-6}$ 1/day         | Estimated in this work                                                                      |
|           | NfM        | $0.60 \times 10^{-6}$ 1/day        | Estimated in this work                                                                      |
|           | pNfH       | $0.58 \times 10^{-6}$ 1/day        | Estimated in this work                                                                      |
| r6        | NfL        | $7.3 \times 10^{-6}$ 1/day         | Assumed equal to r5                                                                         |
|           | NfM        | $0.60 \times 10^{-6}$ 1/day        | Assumed equal to r5                                                                         |
|           | pNfH       | $0.58 \times 10^{-6}$ 1/day        | Assumed equal to r5                                                                         |
| r7        | All        | 449.28 ml/day                      | [3] [4]                                                                                     |
| r8        | All        | 449.28 ml/day                      | Assumed equal to r7                                                                         |
| r9        | All        | 7.4712 ml/day                      | [5]                                                                                         |
| r10       | All        | 20.148 ml/day                      | [5]                                                                                         |
| r11       | All        | 90 ml/day                          | Derived from [6] [7] [4]                                                                    |
| r12       | All        | 259.2 ml/day                       | [8]                                                                                         |
| r13       | NfL        | 10.1 1/day                         | Estimated in this work                                                                      |
|           | NfM        | 0.0181 /day                        | Estimated in this work                                                                      |
|           | pNfH       | 7.4 1/day                          | Estimated in this work                                                                      |
| f(age)    | All        | $0.0975 \times 1.031^{\text{age}}$ | Modeled to reproduce NfL data in [9]                                                        |

Table S1. Parameter estimates of the model with references.

| Compartment                     | Volume (ml) | Reference                                |
|---------------------------------|-------------|------------------------------------------|
| <b>CNS</b>                      | 1265        | [10]                                     |
| <b>PNS neurons</b>              | 130         | See the following supplementary sections |
| <b>Interstitial Fluid (ISF)</b> | 225         | [11] [12]                                |
| <b>Endoneurial fluid</b>        | 88          | See the following supplementary sections |
| <b>CSF cranial</b>              | 75          | [5] (half of total CSF volume)           |
| <b>CSF spinal</b>               | 75          | [5] (half of total CSF volume)           |
| <b>Blood</b>                    | 5110        | [13], considering human weight of 70 kg  |

*Table S2. Volumes of the model compartments with references. For some compartments, the derivation of the volume is detailed in the section “Estimate of PNS and endoneurial fluid volumes”.*

| Subunit     | Initial concentration in CNS and PNS | Reference                                               |
|-------------|--------------------------------------|---------------------------------------------------------|
| <b>NfL</b>  | $1.3 \times 10^5$ ng/ml              | [14], assuming 100 mg of total proteins in 1 g of brain |
| <b>NfM</b>  | $1.17 \times 10^6$ ng/ml             | [14], assuming 100 mg of total proteins in 1 g of brain |
| <b>pNfH</b> | $1.22 \times 10^6$ ng/ml             | [14], assuming 100 mg of total proteins in 1 g of brain |

*Table S3. Nf initial concentrations in CNS and PNS neurons used to compute the steady state condition. Nf concentration in the remaining model compartments has been deduced from the model steady state computed during parameter calibration, as indicated in the Methods section.*

## **ESTIMATE OF PNS AND ENDONEURIAL FLUID VOLUMES**

The volume of the peripheral nervous system and the endoneurial fluid were derived using a series of heterogeneous data. The starting point was an estimate of the percentage of nerve trunks in the body (about 1% of the total body weight [15]). If we consider a body weight of 70 kg, a 30-75% of connective tissue in the PNS ([www.nysora.com](http://www.nysora.com)), the percentage of fiber [16] and if we assume a 1:1 ratio between sensory and motor neurons in the nerve fascicles, we managed to derive the values reported in Supplementary Table S2.

# GLOBAL SENSITIVITY ANALYSIS

| r7      | r6      | r5      | r4      | r3      | r2      | r1      | PNS neuron | ISF volume | Endoneurial | CSF spinal | CSF cranial | CNS neuron | Blood vol. | Age     |                     |
|---------|---------|---------|---------|---------|---------|---------|------------|------------|-------------|------------|-------------|------------|------------|---------|---------------------|
| 0.00000 | 0.00000 | 0.00675 | 0.00000 | 0.00000 | 1.00000 | 0.99997 | 0.00000    | 0.00000    | 0.00000     | 0.00000    | 0.00000     | 0.00000    | 0.00000    | 0.01948 | NfL CNS neurons     |
| 0.00000 | 0.00000 | 0.00044 | 0.00000 | 0.00000 | 1.00000 | 1.00000 | 0.00000    | 0.00000    | 0.00000     | 0.00000    | 0.00000     | 0.00000    | 0.00000    | 0.00126 | NfM CNS neurons     |
| 0.00000 | 0.00000 | 0.00041 | 0.00000 | 0.00000 | 1.00000 | 1.00000 | 0.00000    | 0.00000    | 0.00000     | 0.00000    | 0.00000     | 0.00000    | 0.00000    | 0.00119 | pNFH CNS neurons    |
| 0.00000 | 0.00818 | 0.00000 | 0.99997 | 0.99997 | 0.00000 | 0.00000 | 0.00000    | 0.00000    | 0.00000     | 0.00000    | 0.00000     | 0.00000    | 0.00000    | 0.01953 | NfL motor neurons   |
| 0.00000 | 0.00053 | 0.00000 | 1.00000 | 1.00000 | 0.00000 | 0.00000 | 0.00000    | 0.00000    | 0.00000     | 0.00000    | 0.00000     | 0.00000    | 0.00000    | 0.00127 | NfM motor neurons   |
| 0.00000 | 0.00050 | 0.00000 | 1.00000 | 1.00000 | 0.00000 | 0.00000 | 0.00000    | 0.00000    | 0.00000     | 0.00000    | 0.00000     | 0.00000    | 0.00000    | 0.00119 | pNFH motor neurons  |
| 1.00000 | 0.00000 | 0.99997 | 0.00000 | 0.00000 | 1.00000 | 0.99997 | 0.00000    | 0.00000    | 0.00000     | 0.00000    | 0.00000     | 1.00000    | 0.00000    | 2.74527 | NfL ISF             |
| 1.00000 | 0.00000 | 1.00000 | 0.00000 | 0.00000 | 1.00000 | 1.00000 | 0.00000    | 0.00000    | 0.00000     | 0.00000    | 0.00000     | 1.00000    | 0.00000    | 2.74738 | NfM ISF             |
| 1.00000 | 0.00000 | 1.00000 | 0.00000 | 0.00000 | 1.00000 | 1.00000 | 0.00000    | 0.00000    | 0.00000     | 0.00000    | 0.00000     | 1.00000    | 0.00000    | 2.74739 | pNFH ISF            |
| 0.00000 | 0.99997 | 0.00000 | 0.99997 | 0.99997 | 0.00000 | 0.00000 | 1.00000    | 0.00000    | 0.00000     | 0.00000    | 0.00000     | 0.00000    | 0.00000    | 2.74621 | NfL endoneurial f.  |
| 0.00000 | 1.00000 | 0.00000 | 1.00000 | 1.00000 | 0.00000 | 0.00000 | 1.00000    | 0.00000    | 0.00000     | 0.00000    | 0.00000     | 0.00000    | 0.00000    | 2.74745 | NfM endoneurial f.  |
| 0.00000 | 1.00000 | 0.00000 | 1.00000 | 1.00000 | 0.00000 | 0.00000 | 1.00000    | 0.00000    | 0.00000     | 0.00000    | 0.00000     | 0.00000    | 0.00000    | 2.74746 | pNFH endoneurial f. |
| 0.00000 | 0.12421 | 0.99939 | 0.99997 | 0.99997 | 1.00000 | 0.99997 | 0.12947    | 0.00000    | 0.00000     | 0.00000    | 0.00000     | 0.99967    | 0.00000    | 2.74520 | NfL CSF cranial     |
| 0.00000 | 0.12441 | 0.99964 | 1.00000 | 1.00000 | 1.00000 | 1.00000 | 0.12952    | 0.00000    | 0.00000     | 0.00000    | 0.00000     | 0.99967    | 0.00000    | 2.74738 | NfM CSF cranial     |
| 0.00000 | 0.12442 | 0.99964 | 1.00000 | 1.00000 | 1.00000 | 1.00000 | 0.12952    | 0.00000    | 0.00000     | 0.00000    | 0.00000     | 0.99967    | 0.00000    | 2.74739 | pNFH CSF cranial    |
| 0.00000 | 0.96705 | 0.93443 | 0.99996 | 0.99996 | 1.00000 | 0.99996 | 0.97369    | 0.00000    | 0.00000     | 0.00000    | 0.00000     | 0.94560    | 0.00000    | 2.74591 | NfL CSF spinal      |
| 0.00000 | 0.96727 | 0.93497 | 1.00000 | 1.00000 | 1.00000 | 1.00000 | 0.97370    | 0.00000    | 0.00000     | 0.00000    | 0.00000     | 0.94561    | 0.00000    | 2.74744 | NfM CSF spinal      |
| 0.00000 | 0.96727 | 0.93497 | 1.00000 | 1.00000 | 1.00000 | 1.00000 | 0.97370    | 0.00000    | 0.00000     | 0.00000    | 0.00000     | 0.94561    | 0.00000    | 2.74744 | pNFH CSF spinal     |
| 0.00000 | 0.54374 | 0.99156 | 0.99997 | 0.99997 | 1.00000 | 0.99997 | 0.53731    | 0.00000    | 0.00000     | 0.00000    | 0.00000     | 0.99250    | 1.00000    | 2.74517 | NfL blood           |
| 0.00000 | 0.54412 | 0.99196 | 1.00000 | 1.00000 | 1.00000 | 1.00000 | 0.53740    | 0.00000    | 0.00000     | 0.00000    | 0.00000     | 0.99250    | 1.00000    | 2.74739 | NfM blood           |
| 0.00000 | 0.54412 | 0.99196 | 1.00000 | 1.00000 | 1.00000 | 1.00000 | 0.53740    | 0.00000    | 0.00000     | 0.00000    | 0.00000     | 0.99250    | 1.00000    | 2.74740 | pNFH blood          |



| NfL blood                     |                               |                               |
|-------------------------------|-------------------------------|-------------------------------|
| Local sensitivity at 25 years | Local sensitivity at 45 years | Local sensitivity at 85 years |
| r13                           | Age                           | Age                           |
| Blood volume                  | r13                           | r13                           |
| r1                            | Blood volume                  | Blood volume                  |
| r2                            | r1                            | r1                            |
| CNS neuron volume             | r2                            | r2                            |
| r5                            | CNS neuron volume             | CNS neuron volume             |
| Age                           | r5                            | r5                            |
| PNS neuron volume             | PNS neuron volume             | PNS neuron volume             |
| r6                            | r6                            | r6                            |
| r3                            | r3                            | r3                            |
| r4                            | r4                            | r4                            |
| r7                            | r7                            | r7                            |
| r8                            | r8                            | r8                            |
| r9                            | r9                            | r9                            |
| r10                           | r10                           | r10                           |
| r11                           | r11                           | r11                           |
| r12                           | r12                           | r12                           |
| ISF volume                    | ISF volume                    | ISF volume                    |
| Endoneurial volume            | Endoneurial volume            | Endoneurial volume            |
| CSF cranial volume            | CSF cranial volume            | CSF cranial volume            |
| CSF spinal volume             | CSF spinal volume             | CSF spinal volume             |

*Table S5. Local sensitivity factors of model rates and volumes computed for NfL in blood at different ages. The color scale intensity, from green to white, follows the absolute values of the local sensitivity, from the greatest values to zero. The values are sorted by columns in descending sensitivity order.*

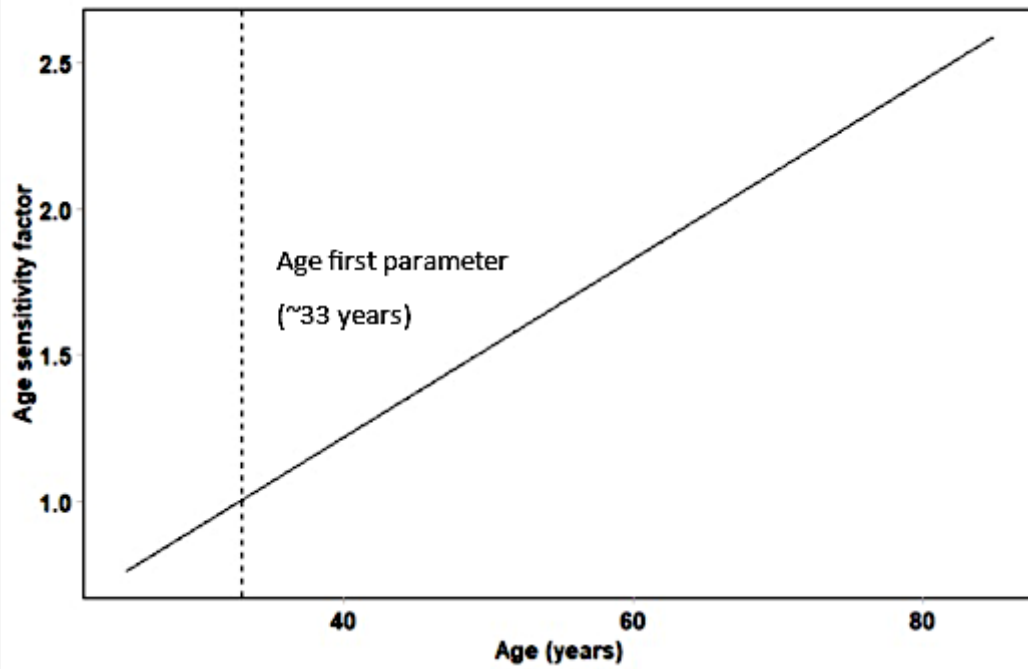

Figure S2. Local sensitivity factor of blood NfL to age as a function of the age itself. The vertical dashed line marks the age at which the age sensitivity factor becomes larger than any other factor considered in the model.

| Rate change | r1     | r2     | r3     | r4     | r5     | r6     | r7   | r8   | r9     | r10   | r11    | r12    | r13  |
|-------------|--------|--------|--------|--------|--------|--------|------|------|--------|-------|--------|--------|------|
| -50%        | -21.46 | 42.88  | -28.54 | 57.04  | -21.45 | -28.54 | 0.00 | 0.00 | -20.81 | 3.46  | 37.46  | 87.45  | 0.00 |
| -40%        | -17.17 | 28.59  | -22.83 | 38.03  | -17.16 | -22.83 | 0.00 | 0.00 | -16.53 | 2.75  | 25.54  | 59.54  | 0.00 |
| -30%        | -12.87 | 18.38  | -17.13 | 24.45  | -12.87 | -17.12 | 0.00 | 0.00 | -12.31 | 2.05  | 16.69  | 38.87  | 0.00 |
| -20%        | -8.58  | 10.72  | -11.42 | 14.26  | -8.58  | -11.41 | 0.00 | 0.00 | -8.14  | 1.36  | 9.86   | 22.94  | 0.00 |
| -10%        | -4.29  | 4.77   | -5.71  | 6.34   | -4.29  | -5.71  | 0.00 | 0.00 | -4.04  | 0.67  | 4.42   | 10.29  | 0.00 |
| 0%          | 0.00   | 0.00   | 0.00   | 0.00   | 0.00   | 0.00   | 0.00 | 0.00 | 0.00   | 0.00  | 0.00   | 0.00   | 0.00 |
| 10%         | 4.29   | -3.90  | 5.71   | -5.19  | 4.29   | 5.71   | 0.00 | 0.00 | 3.99   | -0.67 | -3.67  | -8.53  | 0.00 |
| 20%         | 8.58   | -7.15  | 11.42  | -9.51  | 8.58   | 11.41  | 0.00 | 0.00 | 7.91   | -1.32 | -6.77  | -15.73 | 0.00 |
| 30%         | 12.87  | -9.90  | 17.13  | -13.17 | 12.87  | 17.12  | 0.00 | 0.00 | 11.79  | -1.97 | -9.42  | -21.87 | 0.00 |
| 40%         | 17.17  | -12.26 | 22.83  | -16.31 | 17.16  | 22.82  | 0.00 | 0.00 | 15.61  | -2.61 | -11.71 | -27.18 | 0.00 |
| 50%         | 21.46  | -14.30 | 28.54  | -19.02 | 21.45  | 28.53  | 0.00 | 0.00 | 19.38  | -3.24 | -13.71 | -31.81 | 0.00 |

Table S6. Percentage variations of NfL steady state concentration in CSF spinal as a function of the percentage variations of each rate reported in the first column. The color scale intensity corresponds to the reported values, from green (positive values) to red (negative values).

| Rate change | r1     | r2     | r3    | r4    | r5     | r6    | r7   | r8   | r9   | r10  | r11  | r12  | r13    |
|-------------|--------|--------|-------|-------|--------|-------|------|------|------|------|------|------|--------|
| -50%        | -45.37 | 90.68  | -4.63 | 9.25  | -45.37 | -4.63 | 0.00 | 0.00 | 0.00 | 0.00 | 0.00 | 0.00 | 100.00 |
| -40%        | -36.30 | 60.46  | -3.70 | 6.16  | -36.29 | -3.70 | 0.00 | 0.00 | 0.00 | 0.00 | 0.00 | 0.00 | 66.67  |
| -30%        | -27.22 | 38.87  | -2.78 | 3.96  | -27.22 | -2.78 | 0.00 | 0.00 | 0.00 | 0.00 | 0.00 | 0.00 | 42.86  |
| -20%        | -18.15 | 22.68  | -1.85 | 2.31  | -18.14 | -1.85 | 0.00 | 0.00 | 0.00 | 0.00 | 0.00 | 0.00 | 25.00  |
| -10%        | -9.07  | 10.08  | -0.93 | 1.03  | -9.07  | -0.92 | 0.00 | 0.00 | 0.00 | 0.00 | 0.00 | 0.00 | 11.11  |
| 0%          | 0.00   | 0.00   | 0.00  | 0.00  | 0.00   | 0.00  | 0.00 | 0.00 | 0.00 | 0.00 | 0.00 | 0.00 | 0.00   |
| 10%         | 9.07   | -8.25  | 0.93  | -0.84 | 9.07   | 0.92  | 0.00 | 0.00 | 0.00 | 0.00 | 0.00 | 0.00 | -9.09  |
| 20%         | 18.15  | -15.12 | 1.85  | -1.54 | 18.14  | 1.85  | 0.00 | 0.00 | 0.00 | 0.00 | 0.00 | 0.00 | -16.67 |
| 30%         | 27.22  | -20.94 | 2.78  | -2.13 | 27.21  | 2.77  | 0.00 | 0.00 | 0.00 | 0.00 | 0.00 | 0.00 | -23.08 |
| 40%         | 36.30  | -25.92 | 3.70  | -2.64 | 36.28  | 3.70  | 0.00 | 0.00 | 0.00 | 0.00 | 0.00 | 0.00 | -28.57 |
| 50%         | 45.37  | -30.24 | 4.63  | -3.08 | 45.35  | 4.62  | 0.00 | 0.00 | 0.00 | 0.00 | 0.00 | 0.00 | -33.33 |

Table S7. Percentage variations of NfL steady state concentration in blood as a function of the percentage variations of each rate reported in the first column. The color scale intensity corresponds to the reported values, from green (positive values) to red (negative values).



## References

- [1] R. A. Nixon and K. B. Logvinenko, "Multiple fates of newly synthesized neurofilament proteins: evidence for a stationary neurofilament network distributed nonuniformly along axons of retinal ganglion cell neurons.," *The Journal of cell biology*, vol. 102, p. 647–59, 2 1986.
- [2] A. Yuan, T. Sasaki, M. V. Rao, A. Kumar, V. Kanumuri, D. S. Dunlop, R. K. Liem and R. A. Nixon, "Neurofilaments form a highly stable stationary cytoskeleton after reaching a critical level in axons.," *The Journal of neuroscience : the official journal of the Society for Neuroscience*, vol. 29, p. 11316–29, 9 2009.
- [3] I. Szentistvanyi, C. S. Patlak, R. A. Ellis and H. F. Cserr, "Drainage of interstitial fluid from different regions of rat brain.," *The American journal of physiology*, vol. 246, p. F835–44, 6 1984.
- [4] M. J. Simon and J. J. Iliff, "Regulation of cerebrospinal fluid (CSF) flow in neurodegenerative, neurovascular and neuroinflammatory disease," *Biochimica et Biophysica Acta (BBA) - Molecular Basis of Disease*, vol. 1862, p. 442–451, 3 2016.
- [5] K. Bliouris, P. Gaitonde, W. Yin, D. A. Norris, Y. Wang and S. Henry, "A Semi-Mechanistic Population Pharmacokinetic Model of Nusinersen: An Antisense Oligonucleotide for the Treatment of Spinal Muscular Atrophy," *CPT: Pharmacometrics & Systems Pharmacology*, vol. 7, no. 9, pp. 581-592, 2018.
- [6] M. S. Wolf, Y. Chen, D. W. Simon, H. Alexander, M. Ross, G. A. Gibson, M. D. Manole, H. Bayir, P. M. Kochanek and R. S. B. Clark, "Quantitative and qualitative assessment of glymphatic flux using Evans blue albumin," *Journal of Neuroscience Methods*, vol. 311, p. 436–441, 1 2019.
- [7] T. Brinker, E. Stopa, J. Morrison and P. Klinge, "A new look at cerebrospinal fluid circulation.," *Fluids and barriers of the CNS*, vol. 11, p. 10, 2014.
- [8] M. Edsbacke, M. Tisell, L. Jacobsson and C. Wikkelso, "Spinal CSF absorption in healthy individuals," *American Journal of Physiology-Regulatory, Integrative and Comparative Physiology*, vol. 287, p. R1450–R1455, 12 2004.
- [9] A. Yilmaz, K. Blennow, L. Hagberg, S. Nilsson, R. W. Price, J. Schouten, S. Spudich, J. Underwood, H. Zetterberg and M. Gisslén, "Neurofilament light chain protein as a marker of neuronal injury: review of its use in HIV-1 infection and reference values for HIV-negative controls," *Expert Review of Molecular Diagnostics*, vol. 17, p. 761–770, 8 2017.
- [10] B. Mota and S. Herculano-Houzel, "All brains are made of this: a fundamental building block of brain matter with matching neuronal and glial masses.," *Frontiers in neuroanatomy*, vol. 8, p. 127, 2014.
- [11] H. F. Cserr and C. S. Patlak, "Secretion and Bulk Flow of Interstitial Fluid," Springer, Berlin, Heidelberg, 1992, p. 245–261.

- [12] E. Lüders, H. Steinmetz and L. Jäncke, "Brain size and grey matter volume in the healthy human brain.," *Neuroreport*, vol. 13, p. 2371–4, 12 2002.
- [13] K. P. Davy and D. R. Seals, "Total blood volume in healthy young and older men.," *Journal of applied physiology (Bethesda, Md. : 1985)*, vol. 76, p. 2059–62, 5 1994.
- [14] M. Ferrer-Alcon, J. A. Garcia-Sevilla, P. E. Jaquet, R. La Harpe, B. M. Riederer, C. Walzer and J. Guimon, "Regulation of nonphosphorylated and phosphorylated forms of neurofilament proteins in the prefrontal cortex of human opioid addicts," *Journal of Neuroscience Research*, vol. 61, p. 338–349, 8 2000.
- [15] R. M. Forbes, A. R. Cooper and H. H. Mitchell, "The composition of the adult human body as determined by chemical analysis.," *The Journal of biological chemistry*, vol. 203, p. 359–66, 7 1953.
- [16] A. P. Mizisin and A. Weerasuriya, "Homeostatic regulation of the endoneurial microenvironment during development, aging and in response to trauma, disease and toxic insult.," *Acta neuropathologica*, vol. 121, p. 291–312, 3 2011.
- [17] R. W. P. Cutler and R. B. Spertell, "Cerebrospinal fluid: A selective review," *Annals of Neurology*, vol. 11, p. 1–10, 1 1982.
- [18] L. Sakka, G. Coll and J. Chazal, "Anatomy and physiology of cerebrospinal fluid," *European Annals of Otorhinolaryngology, Head and Neck Diseases*, vol. 128, p. 309–316, 12 2011.
- [19] E. Irle, C. Lange, G. Weniger and U. Sachsse, "Size abnormalities of the superior parietal cortices are related to dissociation in borderline personality disorder," *Psychiatry Research - Neuroimaging*, vol. 156, p. 139–149, 11 2007.
- [20] J. Hall, Guyton and Hall Textbook of Medical Physiology - 12th Edition, Saunders, 2011, p. 669.
- [21] K. Dalamagkas, M. Tsintou, Y. Rathi, L. J. O'Donnell, O. Pasternak, X. Gong, A. Zhu, P. Savadjiev, G. M. Papadimitriou, M. Kubicki, E. H. Yeterian and N. Makris, "Individual variations of the human corticospinal tract and its hand-related motor fibers using diffusion MRI tractography," *Brain Imaging and Behavior*, 2019.
